# Supplementary material for: Facile nanoparticle dispersion detection in energetic composites by rare earth doped in metal oxide nanostructures
Source: Royal Society of Chemistry journal article supplement (doi:10.1039/c5ra10659a), 2015-01-01
Supplement: c5ra10659a2.pdf [file c5ra10659a2.pdf]

**Supporting Information for**

**Facile Nanoparticle Dispersion detection in**

**Energetic Composites by Rare Earth Doped in**

**Metal Oxide Nanostructures**

Robert E. Draper<sup>a</sup>, David L. Reid<sup>a</sup>, Tamil S. Sakthivel<sup>a</sup>, Thomas Sammet<sup>b</sup>, Andrew Demko<sup>b</sup>, Eric L. Petersen<sup>b</sup>, Sudipta Seal<sup>a\*</sup>

<sup>a</sup>Advanced Materials Processing and Analysis Center, Nanoscience and Technology Center,  
Materials Science and Engineering, University of Central Florida, Orlando, Florida, USA

<sup>b</sup>Department of Mechanical Engineering, Texas A&M University, College Station, Texas, USA

**Experiment Details**

TiO<sub>2</sub> nanoparticles were prepared using a hydrothermal synthesis from a titanium isopropoxide (TIP) precursor, and nitric acid stabilizer. The washed nanoparticles were suspended in an 80:20 water:ethanol mixture, and were spray dried with a Bucci spray drier with an ultrasonic nozzle to form spherical agglomerates. As such, the proposed method can be used with the differing spray-drying parameters to create tracers that mimic the behavior of pure, catalytic additives of a wide range of sizes. In this experiment, two sizes of tracers were made to mimic pure additives of two different particle sizes, large (~6 μm) and small (~3.5 μm) particles. After collecting spray dried power, the particles were either heat treated at 400 °C for 3 hours, or were

used as is. These powders were used for some of the characterization (UV-Vis, photoluminescence, XRD, SEM), but to obtain truly representative characterization, the particles were dispersed in a common solid propellant binder, hydroxyl terminated polybutadiene (HTPB), and were mixed using the hand-mixing methods explained by Stephens et al. [1].

### **Illumination of the Embedded particles in a Rubber Binder**

Sample strands were made using the different particle formulations, and with different mixing methods to evaluate if the particle fluorescence could be observed through the binder, and if qualitative information about the dispersion of the particles could be obtained using standard, inexpensive methods. A mercury arc lamp was used to generate light, which was subsequently smoothed with a convex lens and filtered with a 470 nm bandpass filter to generate blue light to illuminate the samples sufficiently and consistently. A Nikon D60 SLR camera with a red filter was used to image the illuminated strands, with an enclosure around the entire apparatus to prevent ambient light from affecting the imaging.

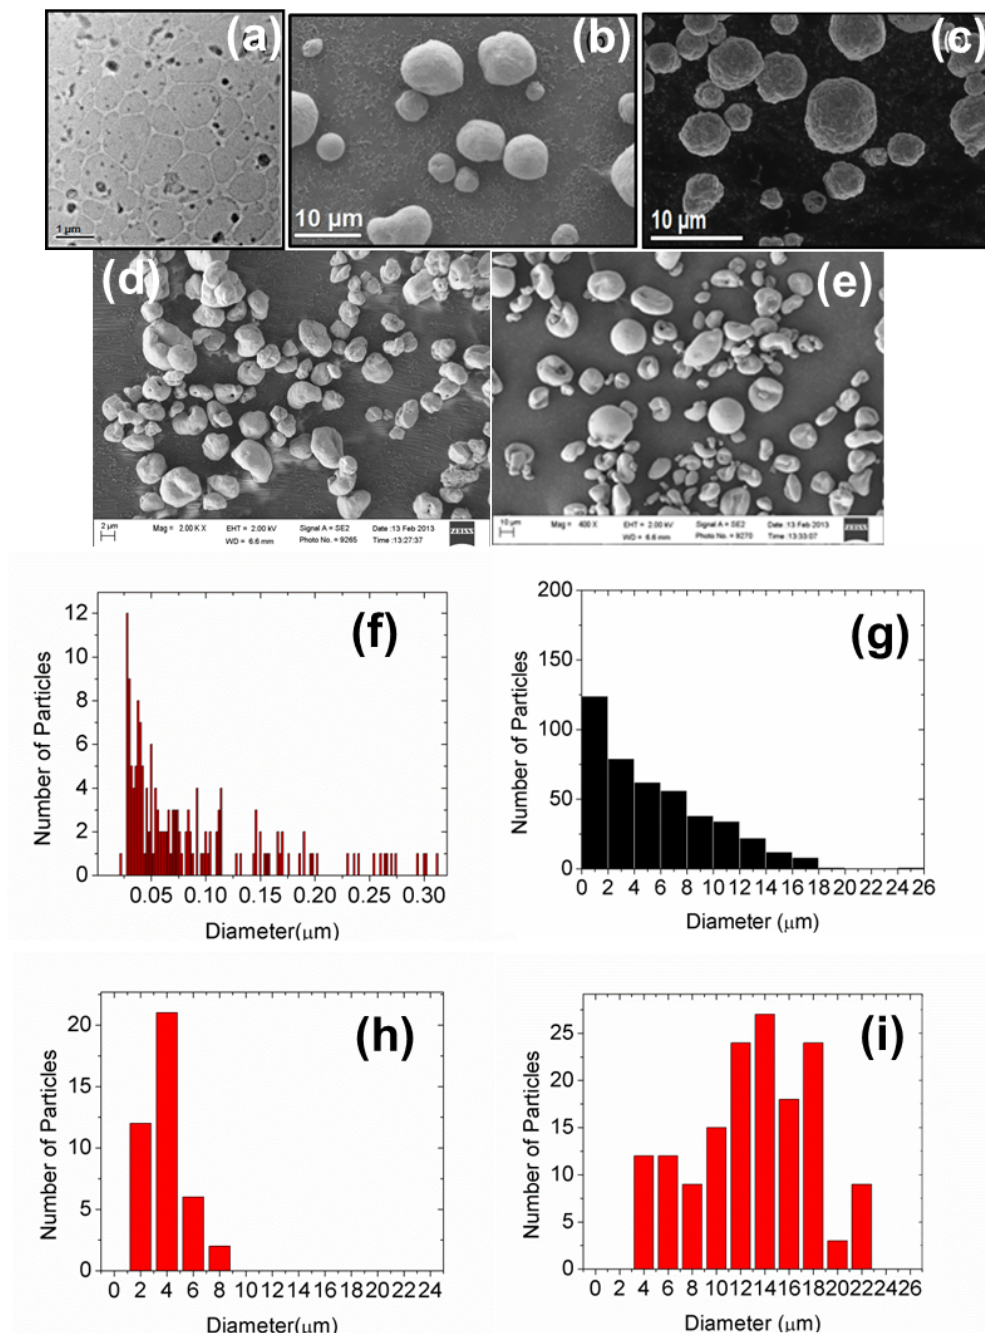

**Figure S1** (a) TEM micrograph of the roughly spheroidal EuTiO<sub>2</sub> small agglomerates (EuTiO<sub>2</sub>-Sm). These particles are around 90 nm in size, shown in histogram (f) which exhibits a truncated normal distribution. (b) SEM micrograph of EuTiO<sub>2</sub>-H spray dried agglomerates, shown in the histogram in (g) to be around 6.2 μm in size. (c) Pure TiO<sub>2</sub> spray dried with the small agglomerate parameters (TiO<sub>2</sub>-H) show that the Eu addition does not significantly affect the agglomerate size or morphology. (d) SEM micrograph of the EuTiO<sub>2</sub>-Md spray dried agglomerates with accompanying size distribution in histogram (h). (e) SEM micrograph of EuTiO<sub>2</sub>-Lg particles with accompanying size distribution in histogram (i).

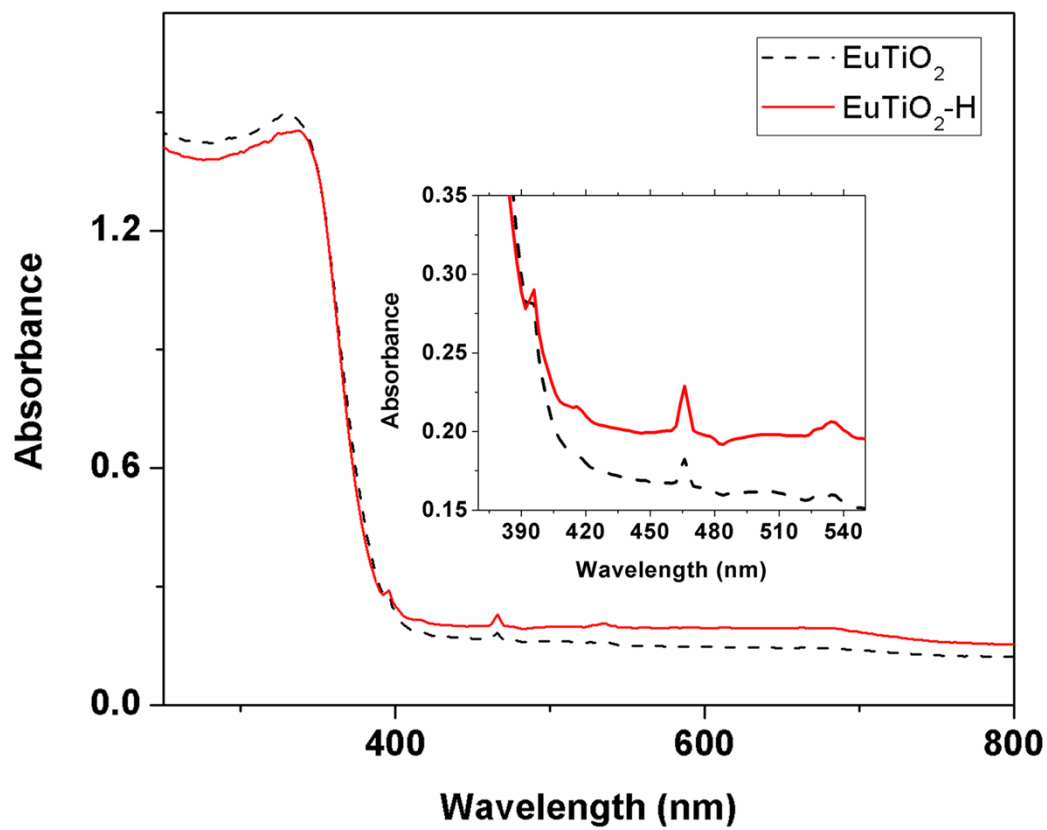

**Figure S2** UV-Visible range diffuse reflectance spectroscopy on both the heat treated ( $\text{EuTiO}_2\text{-H}$ ), and non-heat treated ( $\text{EuTiO}_2$ )  $\text{Eu-TiO}_2$  powder shows excitation peaks at 394, 464, and 534nm.

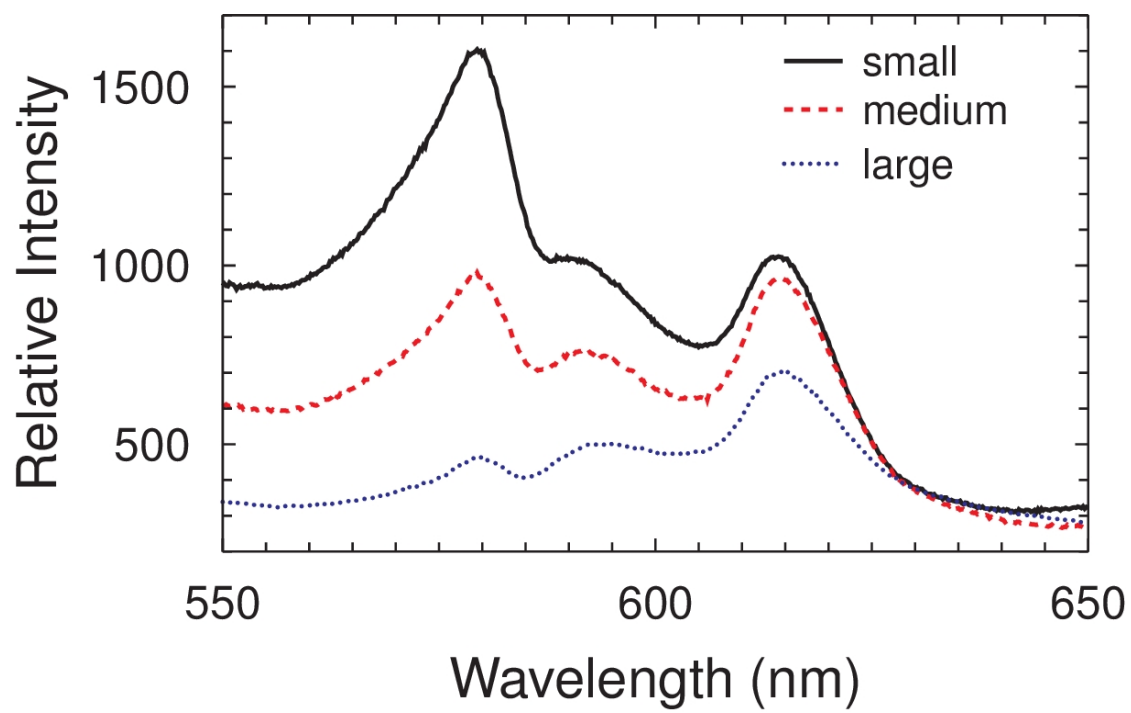

**Figure S3** Photoluminescence data for the small, medium, and large samples

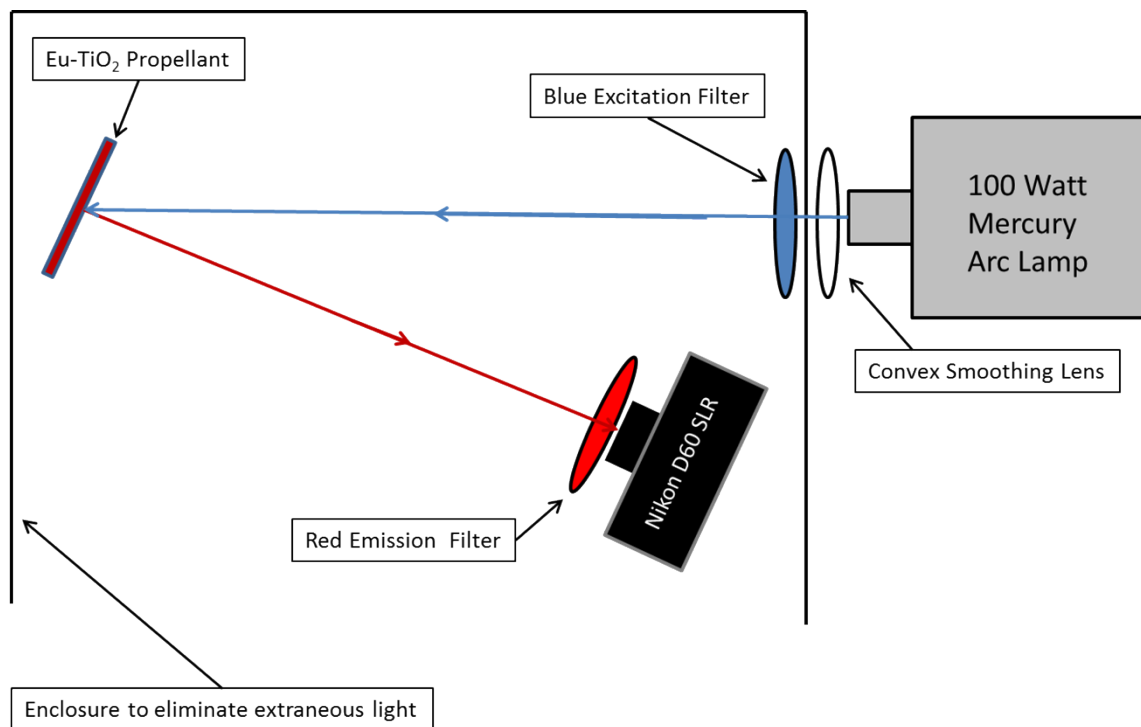

**Figure S4:** Schematic of shrouded illumination setup for inducing fluorescence in bulk strands

## References

1. M. A. Stephens, E. L. Petersen, R. Carro, D. L. Reid and S. Seal, Propellants, Explos. Pyrotech. 2010, **35**, 143–152.
